# Supplementary material
Source: PubMed Central journal article supplement (PMC6344324)
Supplement: NIHMS989182-supplement-SI.pdf [file NIHMS989182-supplement-SI.pdf]

## Supporting Information

### **Methylation Products of 6 $\beta$ -N-heterocyclic substituted naltrexamine derivatives as potential peripheral opioid receptor modulators**

Yi Zheng<sup>a</sup>, Samuel Obeng<sup>a</sup>, Huiqun Wang<sup>a</sup>, David L. Stevens<sup>b</sup>, Essie Komla<sup>b</sup>, Dana E. Selley<sup>b</sup>, William L. Dewey<sup>b</sup>, Hamid I. Akbarali<sup>b</sup>, Yan Zhang<sup>a\*</sup>

<sup>a</sup> Department of Medicinal Chemistry, Virginia Commonwealth University, 800 E. Leigh Street, Richmond, Virginia 23298, United States

<sup>b</sup> Department of Pharmacology and Toxicology, Virginia Commonwealth University, 1112 East Clay Street, Richmond, Virginia 23298, United States

### A. The synthesis of dMNAP

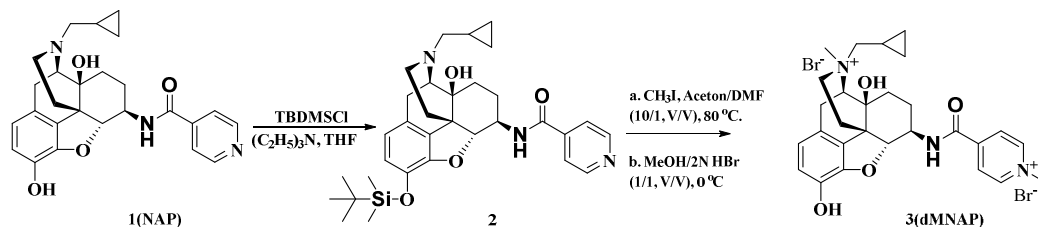

**Scheme 1.** The synthesis procedure of dMNAP(compound 3).

#### 1. 17-Cyclopropylmethyl-14 $\beta$ -hydroxy-4,5 $\alpha$ -epoxy-6 $\beta$ -[(4'-pyridyl)acetamido]-3 $\beta$ -tert-butyl dimethylsilyloxy morphinan (compound 2)

tert-Butyldimethylsilyl chloride (227 mg, 1.5 mmol) was added slowly to the mixture of NAP (100 mg, 0.25 mmol) and trimethylamine (152 mg, 1.5 mmol) in THF at 0 °C. Then, the reaction temperature was warmed to room temperature and kept it stirring for three days at that temperature. Three days later, the reaction was quenched with water and extracted with dichloromethane. The organic phase was collected, dried using Na<sub>2</sub>SO<sub>4</sub> and concentrated under reduce pressure to get the reaction crude. The crude was purified with silica gel to get compound 2 (105 mg) as brown solid in 54 % yield.

Mass Spectrum: [M+ H]<sup>+</sup>, m/z calc. 561.79 obs. 562.3062.

<sup>1</sup>H NMR (400 MHz, CDCl<sub>3</sub>):  $\delta$  8.90 (d,  $J$  = 7.8 Hz, 1H, exchangeable), 8.73 and 8.72 (dd, 1 H each,  $J$  = 1.6 Hz, 2H), 7.73 and 7.32 (dd, 1 H each,  $J$  = 1.6 Hz, 2H), 6.61 (s, 2H), 5.25 (s, 1H), 4.91 (s, 1H), 4.74 (d,  $J$  = 7.8 Hz, 1H), 3.71-3.63 (m, 1H), 3.05 (d,  $J$  = 6.08 Hz, 2H), 2.99 (s, 1H), 2.65-2.59 (m, 2H), 2.40-2.30 (m, 2H), 2.23-2.15 (m, 1H), 2.00-1.94 (m, 1H), 1.85-1.76 (m, 1H), 1.64-1.60 (m, 1H), 1.50 (d,  $J$  = 13.36 Hz, 1H), 1.37-1.31 (m, 1H), 1.26 (d,  $J$  = 13.04 Hz, 2H), 0.85 (s, 9H), 0.48 (d,  $J$  = 7.32 Hz, 2H), 0.48-0.47 (m, 2H), 0.05 (s, 3H), 0.04 (s, 3H).

<sup>13</sup>C NMR (100 MHz, DMSO-*d*<sub>6</sub>)  $\delta$  164.14, 150.11, 144.72, 141.37, 137.93, 131.64, 126.19, 121.29, 121.00, 118.65, 90.47, 69.47, 61.59, 58.28, 51.73, 47.03, 43.51, 30.05, 25.71, 25.35, 24.29, 22.25, 217.70, 9.14, 3.58, 3.46, -0.01, -3.30, -4.79, -4.92.

IR (Diamond, cm<sup>-1</sup>):  $V_{\max}$  2927.62, 2855.22, 1645.75, 1607.83, 1539.71, 1495.21, 1471.46, 1436.78, 1407.52, 1333.15, 1271.20, 1253.78, 1187.13, 1165.60, 1130.22, 1096.87, 1037.43, 1003.75, 985.85, 997.40, 953.66, 882.43, 866.20, 836.31, 781.14, 681.31.

#### 2. 17-Cyclopropylmethyl-3,14 $\beta$ -dihydroxy-4,5 $\alpha$ -epoxy-17-methyl-6 $\beta$ -[(4'-methylpyridyl)acetamido] morphinan (compound 3, dMNAP)

Iodomethane (482 mg, 3.4mmol) was added to a solution of compound 2 (130 mg, 0.23 mmol) in actone/dimethylformamide. Then, the reaction temperature was rose to

80-85 °C and stirred for one week at that temperature. After that, the mixture was concentrated under reduce pressure and the reaction crude was used directly for next step.

The reaction crude was dissolved again in methanol and 2N HBr(V/V, 1:1) at 0 °C and stirred for one hour at that temperature. One hour later, the solvent was removed under reduce pressure. Then, the residue was recrystallized with methanol and diethyl ether to get 90 mg compound 3 as dark yellow solid in 81% yield.

Mass Spectrum:  $[M-CH_3]^+$ , m/z calc. 477.26 obs. 462.2483. mp 154.1-155.5 °C

$^1H$  NMR (400 MHz, DMSO- $d_6$ ):  $\delta$  9.54 (d,  $J = 7.84$  Hz, 1H, exchangeable), 9.41 (s, 1H, exchangeable), 9.18 (d,  $J = 6.68$  Hz, 2H), 8.45 (d,  $J = 6.68$  Hz, 2H), 6.74 (s, 2H), 5.97 (s, 1H, exchangeable), 4.82 (d,  $J = 7.76$  Hz, 1H), 4.41 (s, 3H), 3.88-3.83 (m, 2H), 3.73-3.69 (m, 1H), 3.60 (s, 2H), 3.55 (s, 1H), 3.50 (s, 1H), 3.17 (d,  $J = 1.92$  Hz, 1H), 3.10 (s, 3H), 2.94-2.88 (m, 1H), 2.77-2.71 (m, 1H), 2.16 (t, 1H), 2.00-1.90 (m, 1H), 1.78 (d,  $J = 13.64$  Hz, 1H), 1.57 (d,  $J = 10.4$  Hz, 2H), 1.50-1.43 (m, 1H), 1.24-1.19 (m, 2H), 0.79-0.77 (m, 1H), 0.74-0.68 (m, 1H), 0.64-0.60 (m, 1H), 0.410.36 (m, 1H).

$^{13}C$  NMR (100 MHz, DMSO- $d_6$ )  $\delta$  161.19, 147.24, 146.55, 142.00, 141.87, 129.57, 125.24, 119.95, 119.64, 118.09, 89.64, 71.79, 71.56, 70.92, 57.28, 54.43, 54.39, 54.35, 53.10, 51.77, 34.25, 31.14, 27.42, 24.48, 23.24, 5.79, 3.81, 2.76.

IR (Diamond,  $cm^{-1}$ ):  $V_{max}$  3225.15, 3043.45, 2961.28, 2160.95, 1644.16, 1610.69, 1547.79, 1504.06, 1483.22, 1456.05, 1410.17, 1320.82, 1269.15, 1229.92, 1153.83, 1126.07, 1054.32, 1031.27, 988.08, 944.85, 915.31, 878.13, 854.01, 810.74, 790.64, 749.60.

#### HPLC

Method: C:\star\data\YY\PHPLC\METHODS\C8  
column\60H2O40MeCN1ml20MIN230nm\_dMNMP.mth

Sample: Manual Sample

Injection Date: Fri Nov 03 15:48:07 2017

Manual injection

Operator: Yan Zhang Group

Instrument: Varian Star #1

Notes:

-----

Misc Info

-----

Workstation: D9288P71

Bus Address: 44

Run Time: 0.000 to 20.000 min.

-----

Recalc Info

-----

Recalc Method: C:\star\data\YY\PHPLC\METHODS\C8  
column\60H2O40MeCN1ml20MIN230nm\_dMNMP.mth

Recalc Date: Fri Nov 03 16:08:12 2017

Operator: Yan Zhang Group

Instrument: Varian Star #1

Notes:

Sample Rate: 20.000 Hz.

Measurement Type: 1 = Area

Calculation Type: 1 = %

Normalize Results: No

-----

Peak Info for Channel 1

-----

| 44 Peaks (tR Timeoffset RRT SepcodeWidth Counts Result Name) |       |        |    |      |           |           |  |
|--------------------------------------------------------------|-------|--------|----|------|-----------|-----------|--|
| 2.399                                                        | 0.000 | 0.0000 | TF | 0.00 | 342364320 | 96.519551 |  |
| 10.258                                                       | 0.000 | 0.0000 | TF | 0.00 | 13682469  | 3.480449  |  |

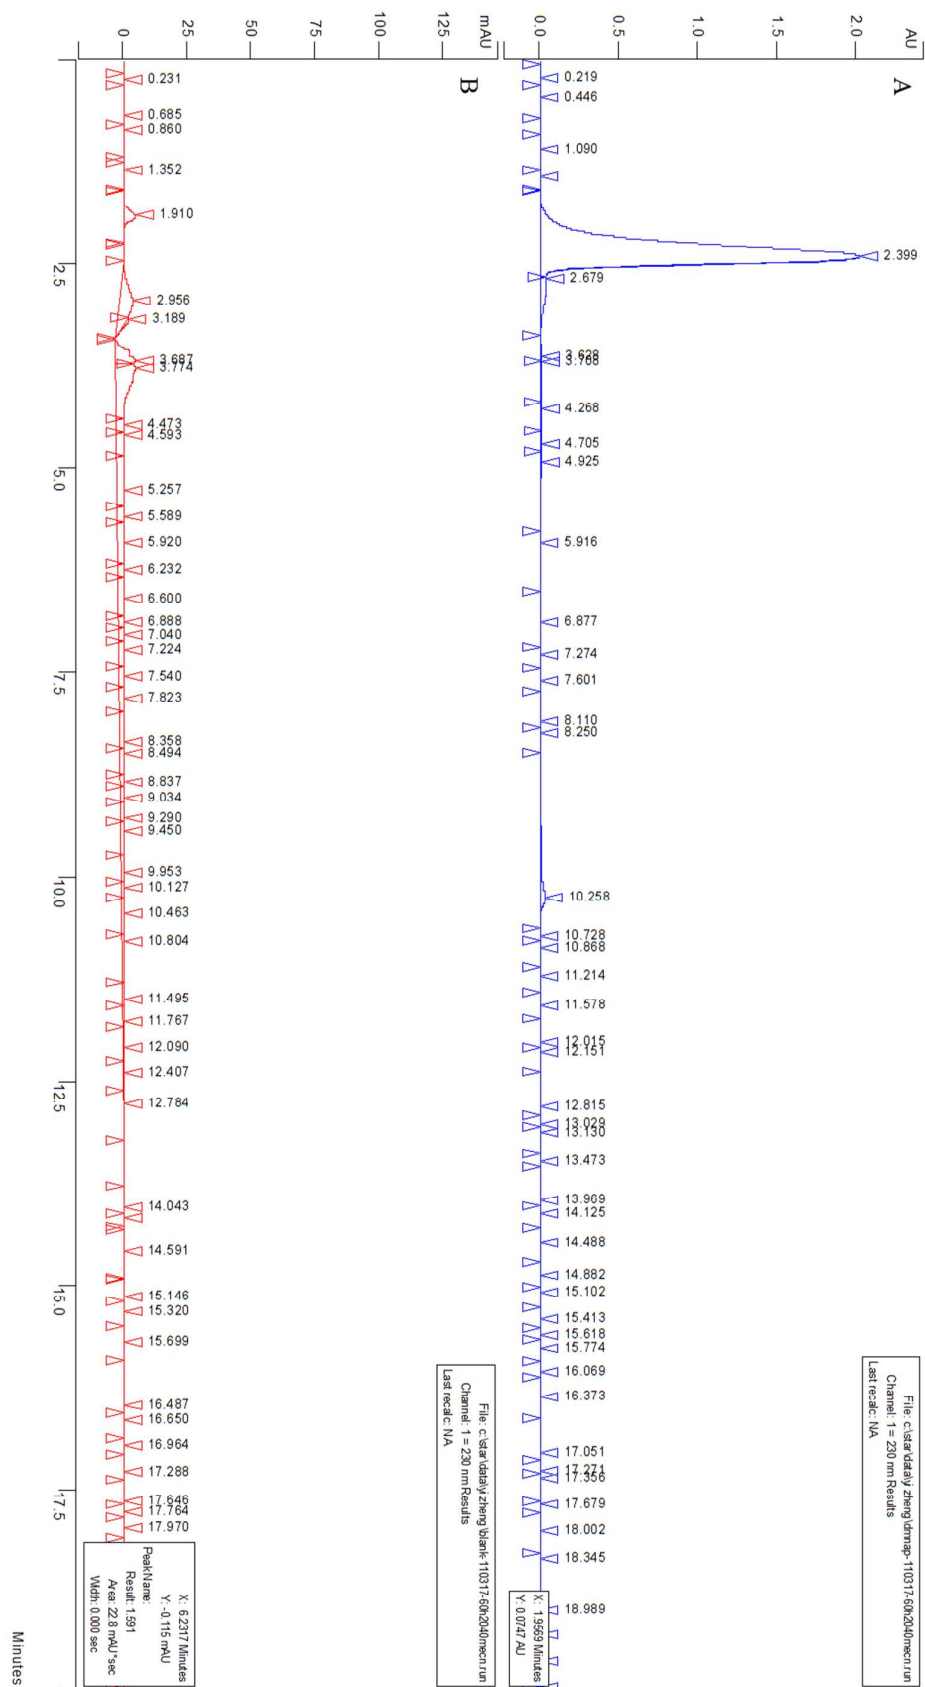

Figure S1. The HPLC of dMNAP (A) and background (B).

## B. The synthesis of dMNMP

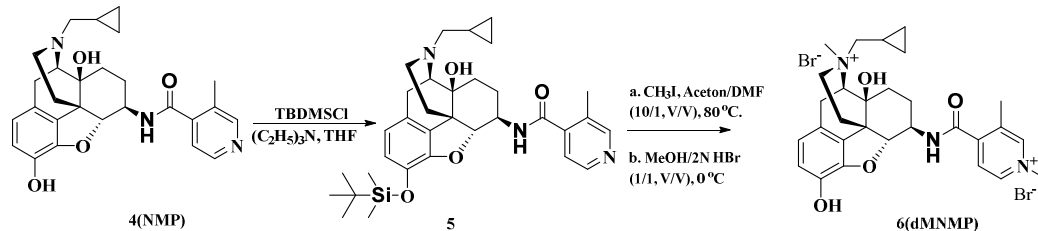

**Scheme 2.** The synthesis procedure of dMNMP(compound 6).

- 17-Cyclopropylmethyl-14 $\beta$ -hydroxy-4,5 $\alpha$ -epoxy-6 $\beta$ -{[4'-(3'-methylpyridyl)carboxamido]}-3 $\beta$ -tert-butyldimethylsilyloxy morphinan (compound 5)

tert-Butyldimethylsilyl chloride (398 mg, 2.64 mmol) was added slowly to the mixture of NMP (200 mg, 0.44 mmol) and trimethylamine (312 mg, 3.08 mmol) in THF at 0 °C. Then, the mixture was warmed to room temperature and stirred for three days at that temperature. Three days later, the reaction was quenched with water and extracted with dichloromethane. The organic phase was collected, dried with  $Na_2SO_4$  and concentrated under reduce pressure to get the reaction crude. The crude was purified with silica gel to get compound 5 (105 mg, 83.3%) as brown solid.

Mass Spectrum:  $[M+ H]^+$ , m/z calc. 575.32 obs. 576.3323

$^1H$  NMR (400 MHz,  $CDCl_3$ ):  $\delta$  8.68 (d,  $J = 7.96$  Hz, 1H), 8.49 (s, 1H), 8.47 (d,  $J = 4.92$  Hz, 1H), 7.21 (d,  $J = 4.88$  Hz, 1H), 6.62 (s, 2H), 4.88 (s, 1H), 4.57 (d,  $J = 7.76$  Hz, 1H), 3.64-3.58 (m, 1H), 3.16 (d,  $J = 5.24$  Hz, 1H), 3.03 (d,  $J = 5.0$  Hz, 2H), 2.98 (s, 1H), 2.62-2.58 (m, 2H), 2.34 (d,  $J = 3.2$  Hz, 1H), 2.31 (s, 3H), 2.19-2.11 (m, 1H), 1.98-1.93 (m, 1H), 1.82-1.73 (m, 2H), 1.69-1.64 (m, 1H), 1.50 (d,  $J = 13.48$  Hz, 1H), 1.36-1.30 (m, 1H), 1.23 (d,  $J = 9.96$  Hz, 1H), 0.92 (s, 9H), 0.87-0.83 (m, 2H), 0.47 (d,  $J = 7.2$  Hz, 2H), 0.12 (d,  $J = 2.44$  Hz, 6H).

$^{13}C$  NMR (100 MHz,  $DMSO-d_6$ )  $\delta$  166.23, 151.03, 147.01, 144.60, 143.43, 137.70, 131.40, 129.37, 126.01, 121.12, 120.46, 118.46, 90.37, 69.27, 61.40, 58.09, 51.27, 46.86, 43.31, 29.98, 29.79, 25.23, 24.17, 22.06, 17.56, 15.64, 8.95, 3.38, 3.27, -0.19, -4.91.

IR (Diamond,  $cm^{-1}$ ):  $V_{max}$  3270.15, 2928.00, 2856.28, 1645.17, 1607.78, 1538.35, 1495.49, 1471.62, 1436.92, 1391.63, 1333.00, 1270.70, 1256.83, 1187.68, 1163.62, 1130.08, 1097.12, 1037.23, 1003.57, 985.94, 952.98, 938.48, 883.98, 861.66, 838.26, 782.43, 748.88, 676.36.

- 17-Cyclopropylmethyl-3,14 $\beta$ -dihydroxy-4,5 $\alpha$ -epoxy-6 $\beta$ -{[4'-methyl-(3'-methylpyridyl)]carboxamido} morphinan (compound 6, dMNMP)

Iodomethane (322 mg, 2.27mmol) was added to a solution of compound 5 (85 mg, 0.15 mmol) in actone/dimethylformamide. Then, the reaction temperature was rose to

80-85 °C and stirred for one week at that temperature. After that, the mixture was concentrated under reduce pressure to get the crude for next step.

The crude was dissolved again in methanol and 2N HBr(V/V, 1:1) at 0 °C and stirred for one hour at that temperature. One hour later, the mixture was concentrated under reduce pressure. The residue was then recrystallized with methanol and diethyl ether to get compound 6 (42 mg) as dark yellow solid in 58.2% yield.

Mass Spectrum:  $[M-CH_3]^+$ , m/z calc. 491.28, obs. 476.2595 mp 151.4-153.4 °C

$^1H$  NMR (400 MHz,  $CDCl_3$ ):  $\delta$  9.36 (s, 1H), 9.07 (s, 1H), 8.97 (d,  $J = 6.16$  Hz, 1H), 8.05 (d,  $J = 6.16$  Hz, 1H), 6.78-6.72 (m, 1H), 6.68-6.66 (m, 1H), 6.28 (s, 1H), 4.70 (d,  $J = 7.72$  Hz, 1H), 4.35 (s, 3H), 3.94-3.83 (m, 2H), 3.67-3.61 (m, 2H), 3.37 (s, 1H), 3.11 (s, 3H), 3.05 (d,  $J = 6.4$  Hz, 1H), 2.91-2.86 (m, 1H), 1.99-1.90 (m, 1H), 1.83-1.81 (m, 1H), 1.69-1.62 (m, 1H), 1.47-1.38 (m, 2H), 1.24-1.22 (m, 1H), 1.11-1.07 (m, 1H), 0.79-0.76 (m, 1H), 0.73-0.67 (s, 1H), 0.65-0.60 (m, 1H), 0.55-0.50 (m, 1H), 0.43-0.36 (m, 1H).

$^{13}C$  NMR (100 MHz,  $DMSO-d_6$ )  $\delta$  163.86, 150.26, 146.66, 143.58, 141.98, 141.42, 135.11, 129.47, 124.79, 120.59, 119.65, 118.11, 117.97, 89.38, 71.59, 69.60, 54.33, 51.46, 47.78, 45.63, 34.12, 27.20, 22.98, 16.18, 5.67, 5.05, 2.59, 0.03.

IR (Diamond,  $cm^{-1}$ ):  $V_{max}$  3187.75, 3033.80, 2161.15, 1657.66, 1548.98, 1502.76, 1463.13, 1427.81, 1384.16, 1325.29, 1270.29, 1236.87, 1155.32, 1125.73, 1092.61, 1053.21, 1032.03, 1013.46, 987.35, 944.40, 917.64, 883.60, 836.92, 829.35, 797.34, 779.96, 748.02, 680.76.

#### HPLC

Method: C:\star\data\YY\PHPLC\METHODS\C8  
column\50H2O50MeCN1ml25MIN230nmdMNAP.mth

Sample: Manual Sample

Injection Date: Fri Nov 03 10:22:09 2017

Manual injection

Operator: Yan Zhang Group

Instrument: Varian Star #1

Notes:

-----

Misc Info

-----

Workstation: D9288P71

Bus Address: 44

Run Time: 0.000 to 20.000 min.

-----

Recalc Info

-----

Recalc Method: C:\star\data\YY\PHPLC\METHODS\C8  
column\50H2O50MeCN1ml25MIN230nmdMNAP.mth

Recalc Date: Fri Nov 03 10:42:40 2017

Operator: Yan Zhang Group

Instrument: Varian Star #1

Notes:

Sample Rate: 20.000 Hz.

Measurement Type: 1 = Area

Calculation Type: 1 = %

Normalize Results: No

-----  
Peak Info for Channel 1  
-----

| 1 Peaks (tR | Timeoffset | RRT    | Sepcode | Width | Counts   | Result     | Name) |
|-------------|------------|--------|---------|-------|----------|------------|-------|
| 2.214       | 0.000      | 0.0000 | BB      | 9.60  | 70580024 | 100.000000 |       |





Table S1. The binding results of dMNAP and dMNMP with somatostatin receptor (NET), peripheral benzodiazepine receptor (PBR), serotonin transporter (SERT), and sigma receptors (Sigma).

| Compounds | NET  | PBR   | SERT  | Sigma 1 | Sigma2<br>PC12 |
|-----------|------|-------|-------|---------|----------------|
| dMNAP     | 14.1 | -10.3 | -10.9 | 5.1     | 9.2            |
| dMNMP     | 23.4 | 16.5  | 6.4   | -1.8    | -16.7          |

Data represent mean % inhibition (N = 4 determinations) for compound tested at receptor subtypes. Significant inhibition is considered > 50%. In cases where negative inhibition (-) is seen, this represents a stimulation of binding. Occasionally, compounds at high concentrations will non-specifically increase binding. The default concentration for primary binding experiments is 10 uM.

Table S2. The binding results of dMNAP and dMNMP with histamine receptors (H1-H4) and muscarinic acetylcholine receptors (M1-M4).

| Compounds | H1   | H2   | H3   | H4    | M1    | M2   | M3   | M4  |
|-----------|------|------|------|-------|-------|------|------|-----|
| dMNAP     | 26.5 | 17.5 | 18.1 | -3.8  | 30.6  | 31.5 | 30.4 | 3.7 |
| dMNMP     | 21.6 | 23.7 | 15.2 | -13.6 | -11.4 | -1.4 | 17.2 | 6.7 |

Data represent mean % inhibition (N = 4 determinations) for compound tested at receptor subtypes. Significant inhibition is considered > 50%. In cases where negative inhibition (-) is seen, this represents a stimulation of binding. Occasionally, compounds at high concentrations will non-specifically increase binding. The default concentration for primary binding experiments is 10 uM.

Table S3. The binding results of dMNAP and dMNMP with dopamine receptor and GABAA receptor

| Compounds | D1   | D2    | D3   | D4   | D5   | DAT  | GABAA |
|-----------|------|-------|------|------|------|------|-------|
| dMNAP     | -4.2 | -11.8 | -0.7 | -3.2 | -2.1 | 0.7  | 16.3  |
| dMNMP     | 7.5  | -14.9 | 10.2 | 2.7  | -1.4 | -4.6 | 27.0  |

Data represent mean % inhibition (N = 4 determinations) for compound tested at receptor subtypes. Significant inhibition is considered > 50%. In cases where negative inhibition (-) is seen, this represents a stimulation of binding. Occasionally, compounds at high concentrations will non-specifically increase binding. The default concentration for primary binding experiments is 10 uM.

Table S4. The binding results of dMNAP and dMNMP with serotonin receptor.

| Compounds | 5-HT<br>1A | 5-HT<br>1B | 5-HT<br>1D | 5-HT<br>1E | 5-HT<br>2A | 5-HT<br>2B | 5-HT<br>2C | 5-HT<br>3 | 5-HT<br>7 |
|-----------|------------|------------|------------|------------|------------|------------|------------|-----------|-----------|
| dMNAP     | 4.6        | 3.1        | -9.1       | 3.9        | -4.5       | -4.8       | 13.8       | -27.4     | 18.7      |
| dMNMP     | -2.3       | 4.6        | -8.2       | 13.8       | -13.8      | -16.9      | 15.6       | -27.8     | 16.6      |

Data represent mean % inhibition (N = 4 determinations) for compound tested at receptor subtypes. Significant inhibition is considered > 50%. In cases where negative inhibition (-) is seen, this represents a stimulation of binding. Occasionally, compounds at high concentrations will

non-specifically increase binding. The default concentration for primary binding experiments is 10 uM.

Table S5. The binding results of dMNAP and dMNMP with adrenergic receptor, Sympathetic receptor, and BZP rat brain site.

| Compounds | Alpha1A | Alpha1B | Alpha1D | Alpha2A | Alpha2B | Alpha2C | Beta1 | Beta3 | BZP Rat Brain Site |
|-----------|---------|---------|---------|---------|---------|---------|-------|-------|--------------------|
| dMNAP     | 1.0     | 0.9     | -2.5    | 13.7    | 5.7     | 31.9    | -18.8 | -2.1  | -4.2               |
| dMNMP     | -7.1    | -1.5    | -5.1    | 17.8    | -0.2    | 19.0    | -7.6  | -10.8 | 11.7               |

Data represent mean % inhibition (N = 4 determinations) for compound tested at receptor subtypes. Significant inhibition is considered > 50%. In cases where negative inhibition (-) is seen, this represents a stimulation of binding. Occasionally, compounds at high concentrations will non-specifically increase binding. The default concentration for primary binding experiments is 10 uM.

Table S6. The measured shortest distances between atoms on critical amino acid residues and atoms on the ligands of dMNAP and dMNMP in the inactive and active MOR and KOR from docking studies.

| Residue           | Receptor     | Atom of residue | Atom of ligand        | Distance (Å) |
|-------------------|--------------|-----------------|-----------------------|--------------|
| D <sup>3.32</sup> | Inactive MOR | N21@dMNAP       | OD2@D <sup>3.32</sup> | 5.8          |
|                   |              | N21@dMNMP       | OD2@D <sup>3.32</sup> | 4.0          |
|                   | Inactive KOR | N21@dMNAP       | OD2@D <sup>3.32</sup> | 6.4          |
|                   |              | N21@dMNMP       | OD2@D <sup>3.32</sup> | 6.4          |
|                   | Active MOR   | N21@dMNAP       | OD2@D <sup>3.32</sup> | 3.8          |
|                   |              | N21@dMNMP       | OD2@D <sup>3.32</sup> | 3.9          |
|                   | Active KOR   | N21@dMNAP       | OD2@D <sup>3.32</sup> | 3.9          |
|                   |              | N21@dMNMP       | OD2@D <sup>3.32</sup> | 4.5          |
| W <sup>6.48</sup> | Inactive MOR | C36@dMNAP       | CZ3@W <sup>6.48</sup> | 3.5          |
|                   |              | C36@dMNMP       | CZ2@W <sup>6.48</sup> | 3.4          |
|                   | Inactive KOR | C36@dMNAP       | CZ2@W <sup>6.48</sup> | 4.4          |
|                   |              | C36@dMNMP       | CZ2@W <sup>6.48</sup> | 4.3          |
|                   | Active MOR   | C36@dMNAP       | CZ3@W <sup>6.48</sup> | 3.9          |
|                   |              | C36@dMNMP       | CZ3@W <sup>6.48</sup> | 3.6          |
|                   | Active KOR   | C36@dMNAP       | CZ3@W <sup>6.48</sup> | 3.2          |
|                   |              | C24@dMNMP       | CH2@W <sup>6.48</sup> | 3.7          |
| Y <sup>7.43</sup> | Inactive MOR | C63@dMNAP       | CZ@Y <sup>7.43</sup>  | 4.1          |
|                   |              | C63@dMNMP       | CZ@Y <sup>7.43</sup>  | 5.3          |
|                   | Inactive KOR | C63@dMNAP       | CZ@Y <sup>7.43</sup>  | 5.0          |
|                   |              | C63@dMNMP       | CZ@Y <sup>7.43</sup>  | 4.8          |
